# Supplementary material
Source: PubMed Central journal article supplement (PMC3276466)

**Supplemental data for: Silva et al “Ablation of Ceramide Synthase 2 Strongly Affects Biophysical Properties of Membranes”**

**Supplemental Figure S1.** LC-ESI MS/MS analysis of SL composition of microsomal brain lipids from WT and CerS2 null mice. (A) Molar fractions of Cer, SM and HexCer in WT and CerS2 null mice. \*,  $p < 0.05$ ; \*\*,  $p < 0.01$ . (B) N-acyl chain distribution of total SLs.  $p < 0.01$  for C18, C24 and C24:1 SL species, CerS2 null compared to WT. (C) N-acyl chain distribution of Cer, SM and HexCer. Values are means  $\pm$  SD ( $n \geq 3$ ). Each sample was measured in duplicate.

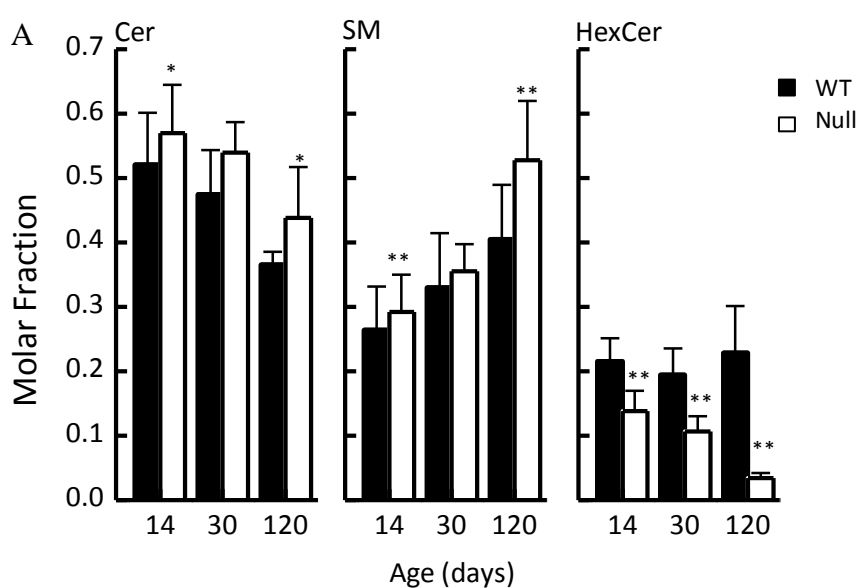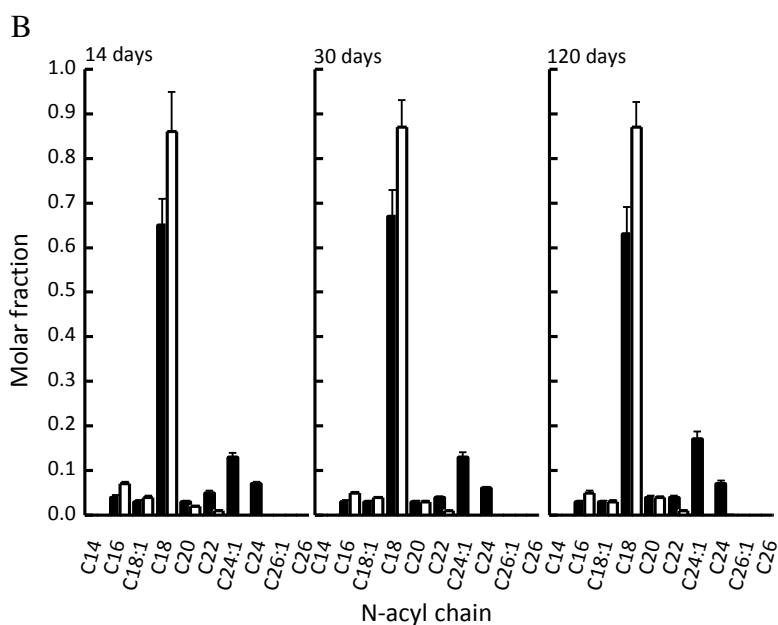

C

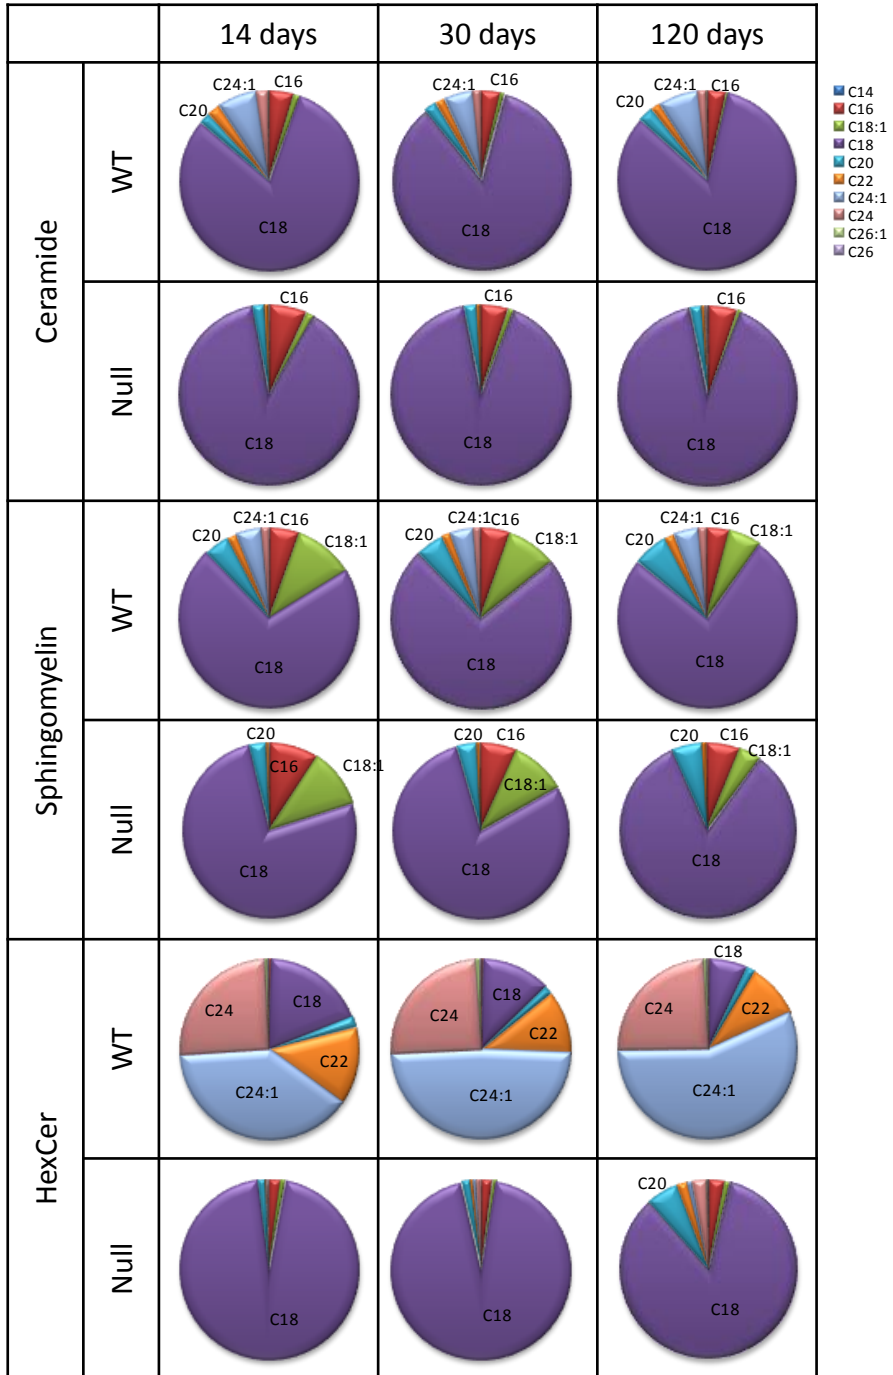

**Supplemental Figure S2.** LC-ESI MS/MS analysis of SL composition of microsomal liver lipids from WT and CerS2 null mice. (A) Molar fraction of Cer, SM and HexCer in wt and CerS2 null mouse. (B) N-acyl chain distribution of total SLs.  $p < 0.01$  for C16, C22, C24, C24:1, C26 and C26:1 SL species, CerS2 null compared to WT. (C) N-acyl chain distribution of Cer, SM and HexCer in WT and CerS2 null mice. Values are means  $\pm$  SD ( $n \geq 3$ ). Each sample was measured in duplicate.

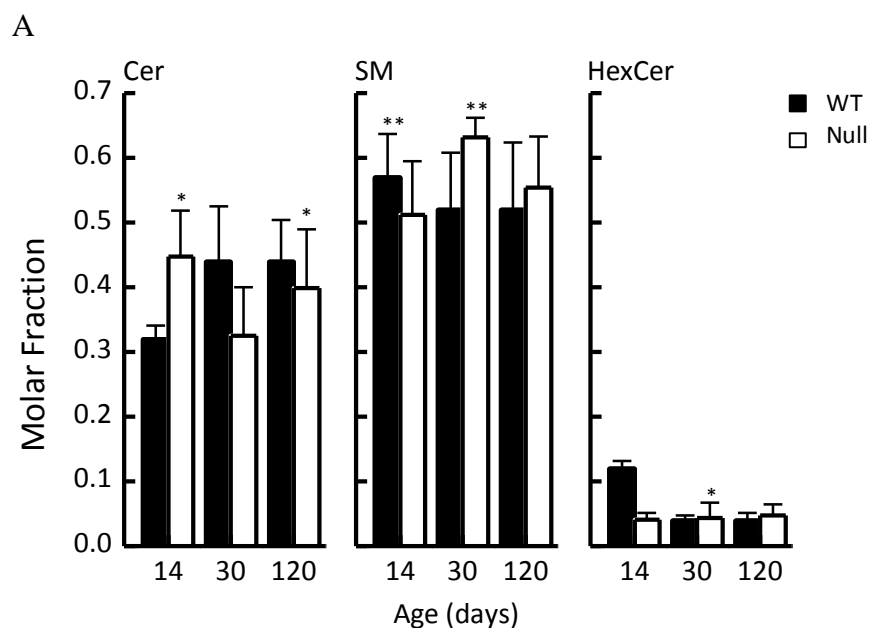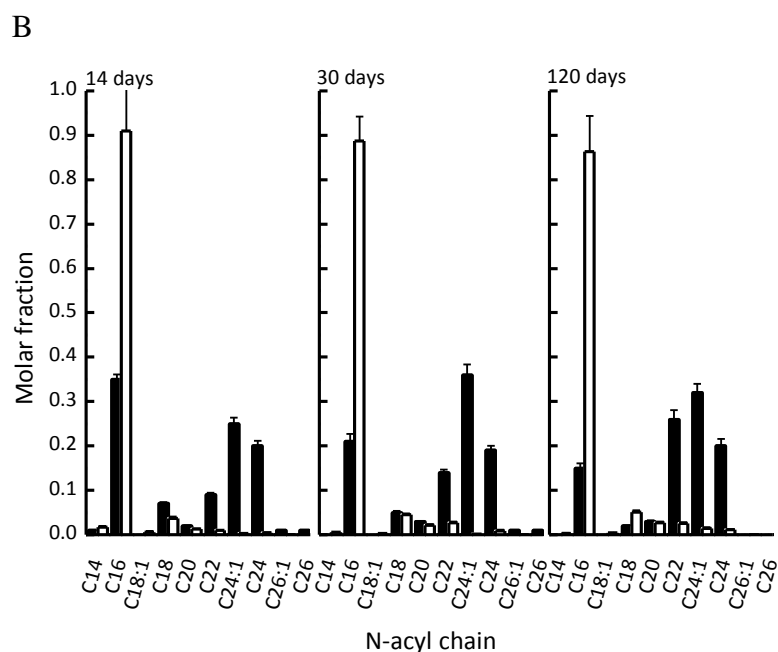

C

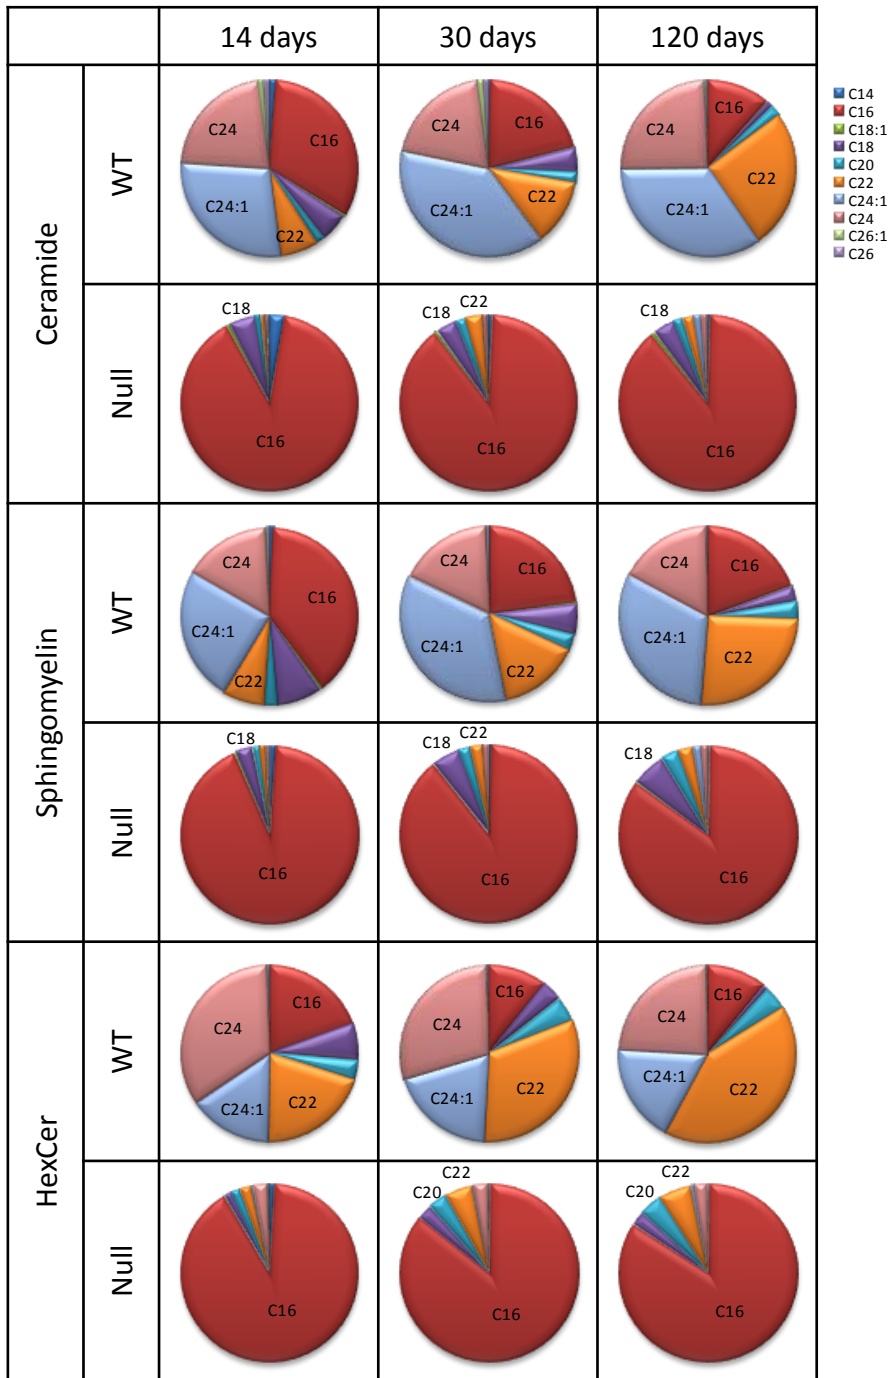

Supplement: supp_M022715_jlr.M022715-1.pdf [file supp_M022715_jlr.M022715-1.pdf]
